# Supplementary material
Source: publisher figshare collection journal article supplement (https://sage.figshare.com/ndownloader/files/14489426)
Supplement: Supplementary file 1 [file 14489426]

**Supplement table. Correlates of abnormal cytology (n=598)**

| Variables                                                        |                  | Prevalence<br>n/N (%) | Crude OR<br>(95% CI) | Adjusted OR <sup>a</sup><br>(95% CI) |
|------------------------------------------------------------------|------------------|-----------------------|----------------------|--------------------------------------|
| Age                                                              | ≤ 30 years       | 11/114 (9.7)          | 1.00                 | 1.00                                 |
|                                                                  | 31-40 years      | 46/293 (15.7)         | 1.74 (0.87-3.50)     | 1.31 (0.63-2.71)                     |
|                                                                  | ≥ 41 years       | 20/191 (10.5)         | 1.10 (0.50-2.38)     | 0.93 (0.42-2.07)                     |
| Education                                                        | No education     | 33/291 (11.3)         | 1.00                 | 1.00                                 |
|                                                                  | Some education   | 44/307 (14.3)         | 1.31 (0.81-2.12)     | 1.21 (0.73-2.02)                     |
| Marital status                                                   | Married          | 37/288 (12.9)         | 1.00                 | Not included in model                |
|                                                                  | Divorced/widowed | 40/310 (12.9)         | 1.01 (0.62-1.62)     |                                      |
| Number of sexual partners to date                                | 1                | 17/136 (12.5)         | 1.00                 | Not included in model                |
|                                                                  | More than 1      | 60/462 (13.0)         | 1.05 (0.59-1.86)     |                                      |
| Age at first sexual encounter                                    | ≤ 16 years       | 29/309 (9.4)          | 1.00                 | 1.00                                 |
|                                                                  | > 16 years       | 48/289 (16.6)         | 1.92 (1.18-3.15)     | 1.80 (1.09-2.99)                     |
| Income (Rupees)                                                  | < 2000           | 30/210 (14.3)         | 1.00                 | 1.00                                 |
|                                                                  | ≥ 2000           | 47/388 (12.1)         | 0.83 (0.51-1.35)     | 1.00 (0.58-1.71)                     |
| Smokeless tobacco use                                            | No               | 64/544 (11.8)         | 1.00                 | 1.00                                 |
|                                                                  | Yes              | 13/54 (24.1)          | 2.38 (1.21-4.68)     | 1.86 (0.88-3.94)                     |
| Years since HIV diagnosis (+1 year)                              |                  |                       | 1.11 (1.04-1.20)     | 1.09 (1.01-1.17)                     |
| Cervical cancer knowledge (“Have you heard of cervical cancer?”) | No               | 64/497 (12.9)         | 1.00                 | 1.00                                 |
|                                                                  | Yes              | 13/101 (12.9)         | 1.00 (0.53-1.89)     | 0.90 (0.46-1.76)                     |

Abbreviations: OR=Odds ratio; CI=Confidence interval.

<sup>a</sup> Adjusted odds ratios for each independent variable were adjusted for all other variables included in the model.
